# Supplementary material for: Assessing optimal time between doses in two-dose vaccination regimen in an ongoing epidemic of SARS-CoV-2
Source: bioRxiv or medRxiv preprint supplement (doi:10.1101/2021.07.28.21261200), 2021-07-31
Supplement: Supplementary file [file media-1.pdf]

# Supplementary Material - Assessing optimal time between doses in two-dose vaccination regimen in an ongoing epidemic of SARS-CoV-2

Leonardo Souto Ferreira<sup>1,2</sup>, Otavio Canton<sup>1,2</sup>, Rafael Lopes Paixão da Silva<sup>1,2</sup>, Silas Poloni<sup>1,2</sup>, Vítor Sudbrack<sup>1,2,3</sup>, Marcelo Eduardo Borges<sup>2</sup>, Caroline Franco<sup>1,2,4</sup>, Flávia Maria Darcie Marquitti<sup>2,5</sup>, José Cássio de Moraes<sup>2,6</sup>, Maria Amélia de Sousa Mascena Veras<sup>2,6</sup>, Roberto André Kraenkel<sup>1,2</sup>, and Renato Mendes Coutinho<sup>2,7</sup>

<sup>1</sup>*Instituto de Física Teórica, Universidade Estadual Paulista, São Paulo, Brazil*

<sup>2</sup>*Observatório Covid-19 BR*

<sup>3</sup>*Department of Ecology and Evolution, University of Lausanne, Lausanne, Switzerland*

<sup>4</sup>*Big Data Institute, Li Ka Shing Centre for Health Information and Discovery, Nuffield Department of Medicine, University of Oxford, Oxford, UK*

<sup>5</sup>*Instituto de Física 'Gleb Wataghin' and Instituto de Biologia, Universidade Estadual de Campinas, Campinas, Brazil*

<sup>6</sup>*Faculdade de Ciências Médicas da Santa Casa de São Paulo, São Paulo, Brazil*

<sup>7</sup>*Centro de Matemática, Computação e Cognição, Universidade Federal do ABC, Santo André, Brazil*

## A. Model Equations

To model the virus dispersal in the population, we assume that asymptomatic individuals have equal infectiousness compared to symptomatic ones, while pre-symptomatics have reduced infectiousness given by  $\omega$ . To model behaviour, we assume that symptomatic individuals isolate themselves at some degree, reducing their contacts by  $\xi$ , individuals with severe disease have greater isolation  $\xi_{sev}$  due to hospitalization. The daily contacts between each age class is given by the matrix  $\hat{C}$  and the force of infection  $\lambda$  is given below:

$$\lambda = \hat{C}[A + \omega E + (1 - \xi)I + (1 - \xi_{sev})H + A_v + \omega E_v + (1 - \xi)I_v + (1 - \xi_{sev})H_v + A_w + \omega E_w + (1 - \xi)I_w + (1 - \xi_{sev})H_w] \quad (1)$$

Our model does not assume a reduction in infectiousness by vaccination given the lack of data<sup>1</sup>.

<sup>1</sup>We expect that this would not change the results qualitatively.

**Unvaccinated**

$$\frac{dS}{dt} = -\beta\lambda\frac{S}{N} - v(t)\frac{S}{S+R} \quad (2a)$$

$$\frac{dE}{dt} = \beta\lambda\frac{S}{N} - \frac{E}{\gamma} \quad (2b)$$

$$\frac{dA}{dt} = \frac{\alpha(1-\sigma)E}{\gamma} - \frac{A}{\nu_i} \quad (2c)$$

$$\frac{dI}{dt} = \frac{(1-\alpha)(1-\sigma)E}{\gamma} - \frac{I}{\nu_i} \quad (2d)$$

$$\frac{dH}{dt} = \frac{\sigma E}{\gamma} - \frac{H}{\nu_s} \quad (2e)$$

$$\frac{dR}{dt} = \frac{A}{\nu_i} + \frac{I}{\nu_i} + \frac{(1-\mu)H}{\nu_s} - v(t)\frac{R}{S+R} \quad (2f)$$

$$\frac{dD}{dt} = \frac{\mu H}{\nu_s} \quad (2g)$$

**Vaccinated once**

$$\frac{dS_v}{dt} = -\beta_v\lambda\frac{S_v}{N} + v(t)\frac{S}{S+R} - (1-\theta)v(t-a)\frac{S(t-a)}{S(t-a)+R(t-a)} \quad (2h)$$

$$\frac{dE_v}{dt} = \beta_v\lambda\frac{S_v}{N} - \frac{E_v}{\gamma} \quad (2i)$$

$$\frac{dA_v}{dt} = \frac{\alpha_v(1-\sigma_v)E_v}{\gamma} - \frac{A_v}{\nu_i} \quad (2j)$$

$$\frac{dI_v}{dt} = \frac{(1-\alpha_v)(1-\sigma_v)E_v}{\gamma} - \frac{I_v}{\nu_i} \quad (2k)$$

$$\frac{dH_v}{dt} = \frac{\sigma_v E_v}{\gamma} - \frac{H_v}{\nu_s} \quad (2l)$$

$$\frac{dR_v}{dt} = \frac{A_v}{\nu_i} + \frac{I_v}{\nu_i} + \frac{(1-\mu_v)H_v}{\nu_s} + v(t)\frac{R}{S+R} - (1-\theta)v(t-a)\frac{R(t-a)}{S(t-a)+R(t-a)} \quad (2m)$$

$$\frac{dD_v}{dt} = \frac{\mu_v H_v}{\nu_s} \quad (2n)$$

**Vaccinated twice**

$$\frac{dS_w}{dt} = -\beta_w\lambda\frac{S_w}{N} + (1-\theta)v(t-a)\frac{S(t-a)}{S(t-a)+R(t-a)} \quad (2o)$$

$$\frac{dE_w}{dt} = \beta_w\lambda\frac{S_w}{N} - \frac{E_w}{\gamma} \quad (2p)$$

$$\frac{dA_w}{dt} = \frac{\alpha_w(1-\sigma_w)E_w}{\gamma} - \frac{A_w}{\nu_i} \quad (2q)$$

$$\frac{dI_w}{dt} = \frac{(1-\alpha_w)(1-\sigma_w)E_w}{\gamma} - \frac{I_w}{\nu_i} \quad (2r)$$

$$\frac{dH_w}{dt} = \frac{\sigma_w E_w}{\gamma} - \frac{H_w}{\nu_s} \quad (2s)$$

$$\frac{dR_w}{dt} = \frac{A_w}{\nu_i} + \frac{I_w}{\nu_i} + \frac{(1-\mu_w)H_w}{\nu_s} + (1-\theta)v(t-a)\frac{R(t-a)}{S(t-a)+R(t-a)} \quad (2t)$$

$$\frac{dD_w}{dt} = \frac{\mu_w H_w}{\nu_s} \quad (2u)$$

The equations were numerically solved by the R package developed by FitzJohn and Hinsley [2].

### B. Parameterization of the model

The parameters that do not depend on vaccination are given in Table I.

TABLE I: Epidemiological parameters

| Parameter   | Description                                                                                  | Value                 | Source                                |
|-------------|----------------------------------------------------------------------------------------------|-----------------------|---------------------------------------|
| $\gamma$    | Average time in days between being infected and developing symptoms                          | 5.8                   | Wei et al. [8]                        |
| $\nu_i$     | Average time in days between being infectious and recovering for asymptomatic and mild cases | 9.0                   | Cevik et al. [1]                      |
| $\nu_s$     | Average time between being infectious and recovering/dying for severe cases                  | 8.4                   | SIVEP-Gripe for São Paulo State [3]   |
| $\xi$       | Reduction on the exposure of symptomatic cases (due to symptoms/quarantining)                | 0.1                   | Assumed                               |
| $\xi_{sev}$ | Reduction on the exposure of severe cases (due to hospitalization)                           | 0.9                   | Assumed                               |
| $\omega$    | Relative infectiousness of pre-symptomatic individuals                                       | 1.0                   | Assumed                               |
| $\alpha$    | Proportion of asymptomatic cases                                                             | [0.67,0.44,0.31]      | Juvenile [6]<br>Adult and Elderly [7] |
| $\sigma$    | Proportion of infectious cases that require hospitalization                                  | [0.001, 0.014, 0.099] | Salje et al. [5]                      |
| $\mu$       | In-hospital mortality ratio                                                                  | [0.417,0.188,0.754]   | Portella et al. [4]                   |

20

### REFERENCES

- [1] Muge Cevik et al. “SARS-CoV-2, SARS-CoV, and MERS-CoV viral load dynamics, duration of viral shedding, and infectiousness: a systematic review and meta-analysis”. In: *The Lancet Microbe* 2.1 (Jan. 2021), e13–e22. ISSN: 26665247. DOI: [10.1016/S2666-5247\(20\)30172-5](https://doi.org/10.1016/S2666-5247(20)30172-5). URL: <https://linkinghub.elsevier.com/retrieve/pii/S2666524720301725>.
- [2] Rich FitzJohn and Wes Hinsley. *dde: Solve Delay Differential Equations*. R package version 1.0.1. 2020. URL: <https://CRAN.R-project.org/package=dde>.
- [3] Ministério da Saúde. *SRAG 2021 - Banco de Dados de Síndrome Respiratória Aguda Grave - incluindo dados da COVID-19*. 2021. URL: <https://opendatasus.saude.gov.br/dataset/bd-srag-2021> (visited on 07/28/2021).
- [4] Tatiana Pineda Portella et al. “Temporal and geographical variation of COVID-19 in-hospital fatality rate in Brazil”. In: *medRxiv* (Feb. 2021). DOI: [10.1101/2021.02.19.21251949](https://doi.org/10.1101/2021.02.19.21251949). URL: <https://doi.org/10.1101/2021.02.19.21251949>.
- [5] Henrik Salje et al. “Estimating the burden of SARS-CoV-2 in France”. In: *Science* 369.6500 (May 2020), pp. 208–211. DOI: [10.1126/science.abc3517](https://doi.org/10.1126/science.abc3517). URL: <https://doi.org/10.1126/science.abc3517>.
- [6] Secretaria Municipal de Saúde - Município de São Paulo. *Inquérito sorológico para Sars-Cov-2: Prevalência da infecção em escolares das redes públicas e privada da cidade de São Paulo*. 2021. URL: [http://www.capital.sp.gov.br/arquivos/pdf/2021/coletiva\\_saude\\_14-01.pdf](http://www.capital.sp.gov.br/arquivos/pdf/2021/coletiva_saude_14-01.pdf) (visited on 01/31/2021).
- [7] W. W. Sun et al. “Epidemiological characteristics of COVID-19 family clustering in Zhejiang Province”. In: *Chinese journal of preventive medicine* 54.6 (2020), pp. 625–629. ISSN: 02539624. DOI: [10.3760/cma.j.cn112150-20200227-00199](https://doi.org/10.3760/cma.j.cn112150-20200227-00199).
- [8] Yongyue Wei et al. “A systematic review and meta-analysis reveals long and dispersive incubation period of COVID-19”. In: *medRxiv* (2020).
